# Supplementary material
Source: publisher figshare collection journal article supplement (https://diabetesjournals.figshare.com/articles/dataset/_/18621602)
Supplement: Supplementary file 1 [file 1]

**Brooks-Worrell B, et al. “Islet autoimmunity is highly prevalent and associated with diminished  $\beta$ -cell function in patients with type 2 diabetes in the GRADE Study”**

**Supplement**

|                                    |      |    |
|------------------------------------|------|----|
| Statistical Analysis               | Page | 2  |
| Supplementary figure 1 (Figure S1) |      | 9  |
| Supplementary figure 2 (Figure S2) |      | 10 |
| Supplementary figure 3 (Figure S3) |      | 11 |
| Supplementary figure 4 (Figure S4) |      | 12 |
| Supplementary figure 5 (Figure S5) |      | 13 |
| Complete GRADE Research Group      |      | 14 |
| Supplementary table 1              |      | 21 |
| Supplementary References           |      | 22 |

## Statistical Analysis

Power and Sample Size: Sample size for the ancillary study was determined to detect differences in  $\beta$ -cell function among T cell positive and negative patients in the GRADE longitudinal study over 3 years. Sample size and power calculations used data from two previous studies <sup>1,2</sup> with similar duration of diabetes and expected trajectory of  $\beta$ -cell function in patients that suggested an effect size of  $d = 0.37$  with standard error of  $se = 2.37$ . Using the R-package 'longpower' <sup>3</sup> (<https://CRAN.R-project.org/package=longpower>) for a linear longitudinal analysis with 3 time points, and allowing for 10% dropout rate,  $n=102$  samples from each treatment arm of GRADE ( $n=408$  total) were found necessary to achieve 90% power for detecting this difference at a significance level of  $\alpha=0.05$ .

To calculate the power of our tests for detecting differences in baseline  $\beta$ -cell functions among T cell positive and negative patients, a retrospective analysis was performed based on multivariable linear regressions on multiply imputed data. Given the use of Holm's procedure for multiple comparison adjustment,<sup>4</sup> we calculated the smallest effect size based on Cohen's formula ( $f^2 = (R^2_{A,B} - R^2_A) / (1 - R^2_{A,B})$ ) <sup>5</sup> for the association between two measures of  $\beta$ -cell function (AUC-CG and C-peptide index) and T cell status, adjusting for either 1/fasting C-peptide or C-peptide based HOMA2-S and other covariates described in the main paper. Here,  $R^2_{A,B}$  is the proportion of variance in  $\beta$ -cell function explained by the full model and  $R^2_A$  is the proportion of the variance explained by the reduced model excluding T cell status. Using the 'wp.regression' function from 'WebPower' package <sup>6</sup> (<https://CRAN.R-project.org/package=WebPower>), for  $n=322$

samples with non-missing T cell status, our multiple regression models have >99% power to detect the average minimum effect size of  $f^2 = 0.14$  observed across the multiply imputed regressions.

*Analyses for primary and secondary hypotheses:* To test the primary hypothesis of the study, namely whether islet cell autoimmunity is associated with greater  $\beta$ -cell dysfunction at baseline among T2D patients in GRADE, two measures of  $\beta$ -cell function, namely, incremental AUC-CG and C-peptide index, were considered. Analysis of 273 participant samples with both insulin and C-peptide levels measured in the OGTT samples indicated a high correlation between AUC-based calculations using C-peptide values and those using insulin values (Spearman  $\rho=0.91$ ).

The association between the two measures of  $\beta$ -cell function, i.e., incremental AUC-CG and C-peptide index, with T cell positivity were assessed using linear models with one of the  $\beta$ -cell function measures as the outcome. Both measures are ratios, which can cause issues when used as outcome in linear regression <sup>7</sup>. Moreover, as shown in **Fig S4**, both measures have skewed distributions. To address these issues, the log transformed  $\beta$ -cell measures, i.e.  $\log(\text{incremental AUC-CG})$  and  $\log(\text{C-peptide index})$ , were used as the outcomes in the multivariable regressions. The effect of this log transformation is to include the denominator of the ratio as an offset term in linear regression, which mitigates the potential issues rising from the use of ratios <sup>7</sup>. However, log transformation of the outcome can also cause issues in the presence of heteroscedasticity <sup>8</sup>.

Examining variances of regression outcomes, i.e.  $\log(\text{incremental AUC-CG})$  and  $\log(\text{C-peptide index})$ , indicates that heteroscedasticity is not a major concern. In particular, the 95% CI for ratio of variances obtained using the 'var.test' function in R is (0.6,1.1), which indicates that variances of  $\log(\text{incremental AUC-CG})$  in T cell-positive and -negative patients (0.29 and 0.35, respectively) are not statistically different. Similarly, while the variances of  $\log(\text{C-peptide index})$  in T cell-positive and -negative groups (0.32 and 0.44, respectively) are slightly more distinct, they are not statistically different either, as indicated by the 95% CI for ratio (0.53, 1.02).

We also examined the heteroscedasticity of the regression outcomes,  $\log(\text{incremental AUC-CG})$  and  $\log(\text{C-peptide index})$  across the quantitative T cell reactivity measure using the tools in the 'ggfortify' R package <sup>9</sup>. In particular, the residuals-versus-fitted plots and the QQ-plots for normality (**Fig S5**) in regressing models with either  $\log(\text{incremental AUC-CG})$  or  $\log(\text{C-peptide index})$  as outcome and T cell reactivity as independent variable indicate no significant trends, or evidence of non-normality. The log transformation and the lack of significant heteroscedasticity justifies the use of the above linear models. To further guard against effects of potential misspecification on validity of inference results, inferences were carried using robust (sandwich) standard errors for regressions with multiply imputed data. As a result, the study findings are valid in terms of projections to the space of covariates, even in the presence of misspecification <sup>10,11</sup>.

To assess the association between the measures of  $\beta$ -cell function and T cell status, key variables known to affect insulin secretion were pre-determined and included as covariates in the models. The covariates include antibody positivity, age, sex, BMI, duration of diabetes, medications other than metformin and a measure of insulin sensitivity. Two parameters were considered as measure of insulin sensitivity: 1) the homeostasis model assessment-2 for sensitivity based on fasting C-peptide and 2)  $1/\text{fasting C-peptide}$ . HOMA2-S of steady state insulin sensitivity was calculated using the HOMA-2 Calculator version 2.2.3 (Diabetes Trials Unit, University of Oxford, Oxford, UK). The HOMA computer module (HOMA2 using insulin values) is correlated with “gold standard” measures of insulin sensitivity (e.g., hyperinsulinemic euglycemic clamp, rapid sampling IVGTT) with (Pearson) correlations in the 0.6–0.7 range <sup>1,2,12,13</sup>. HOMA can be seen as a surrogate for the gold standard measures, which can be interpreted as a covariate measured with error in the regression model. While HOMA is not the exposure of interest in our analyses, measurement error in HOMA can lead to incomplete adjustment for insulin sensitivity or reduced power <sup>14</sup>. Based on data from 3637 GRADE participants with both insulin and C-peptide measurements at baseline, HOMA2-S calculated using C-peptide levels correlates well with that calculated using insulin levels (Spearman  $\rho=0.86$ ). Data from 302 participants with both measurements in our ancillary study showed a similar correlation (Spearman  $\rho=0.88$ ).

Similar models and inferences were also used for assessing the association between  $\beta$ -cell function and T cell reactivity (number of islet blots) and autoantibody positivity. Plots were generated using the ‘ggpubr’ package in the R-programming language (version

3.6.1). Spearman correlation coefficient was used as a robust (rank-based) alternative to the Pearson correlation coefficient. Exact tests for proportions <sup>5</sup> using the R-function 'binom.test' were carried out to test the null hypotheses about the proportion of autoantibody positive or T cell positive patients. Confidence intervals for proportions were also obtained from the same function, using the method of Clopper and Pearson <sup>15</sup>, which guarantees exact coverage.

Missing data considerations: Nine covariates had more than 10% missingness, mainly for the variable of T cell reactivity. Principal reasons for missing T cell reactivity data were severe hemolysis noted upon receipt of the overnight shipped samples, or PBMCs observed by microscopy to be of poor quality or insufficient quantity to proceed with the T cell assay. In some cases, PBMCs that underwent the assay were unresponsive to the Con A control standard (i.e.,  $SI \leq 20$  despite the PBMCs appearing structurally intact at the start of the assay), and these samples were also included in the missing category. The occurrence of missing data was likely to have occurred randomly and independent of any measures or unmeasured variables (i.e., data is missing completely at random, MCAR), since if only cases with available values for T cell reactivity were utilized, none of the other variables had significant missing values, while their overall pattern of missed data remained the same. Hence, for the present analysis, only data of participants with available T cell reactivity values were utilized whenever the analysis involved T cell reactivity, and the missing values in the other covariates were multiply imputed to mitigate bias and loss of efficiency. Missing values for other covariates were considered to be missing at random (MAR) and were therefore multiply imputed based

on values of observed covariates. In addition to missing values in data from the parent GRADE study, negative values in C-peptide Index (14 cases) and incremental AUC-CG (1 case) were also set to be missing prior to multiple imputation, as negative values for these measures are biologically implausible and likely occurred due to assay errors.

*Imputation methods:* Multivariate Imputation by Chained Equations (MICE) implemented in R-package 'mice' <sup>16</sup> was used to impute the missing values. In this approach, multiple imputations are performed using fully conditional specification, providing more flexible imputation for covariates with different distributions. Linear models for assessing the relationships between  $\beta$ -cell functions (log-transformed incremental AUC-CG and log transformed C-peptide Index) as dependent variable, and T cell positivity, T cell reactivity and antibody positivity (adjusting for a measure of insulin sensitivity, age, sex, antibody positivity, BMI, duration of diabetes and medications other than metformin) were fit for each of  $n = 10$  multiply imputed data sets, and results were aggregated using Rubin's rules for multiple imputation <sup>19</sup> implemented in the 'mitools' package in R.

*Multiple Comparison Adjustment:* Our analysis involves testing the association of two measures of  $\beta$ -cell functions (c-peptide index and iAUC-CG) with T cell status (similarly, antibody status and T cell reactivity). Each of these  $\beta$ -cell response measures were also adjusted for insulin sensitivity using one of two parameters (1/fasting C-peptide and C-peptide-based HOMA2-S). Therefore, for each of T cell status, antibody status and T cell reactivity, our analysis involves four hypotheses (correspondingly, confidence

intervals) that need to be adjusted for multiple comparisons. To account for multiplicity, confidence intervals for the estimates of effect size in each of these 4 models and the corresponding p-values were adjusted for multiple comparisons using Holm's procedure for controlling family-wise error rate (FWER) <sup>17,18</sup>. Holm's procedure for p-values is implemented in the `p.adjust()` function in R (method = "holm"). Given that existing R functions do not facilitate adjustment of confidence intervals for multiple comparisons, we use an in-house R program that implements the Holm's adjustment. More specifically, Holm's adjustment involves multiplying the significance level for each hypothesis (and the corresponding confidence interval) by a multiplier given by  $m - r_k + 1$ , where  $m$  is the total number of hypotheses (here, 4) and  $r_k$  is the rank of the p-value for the  $k$ th hypothesis ( $k = 1, \dots, m$ ). To obtain adjusted confidence intervals for transformed parameters, (e.g., relative or absolute differences), we first adjust the confidence intervals for the original parameters (i.e., regression coefficients) and then transform the adjusted confidence intervals in the same manner as the unadjusted confidence intervals – this requires exponentiating the confidence interval endpoints for relative differences and using the delta method <sup>20</sup> for absolute differences. The inference results along with multiply adjusted q-values and confidence intervals for original regression parameters, relative differences and absolute differences are summarized in Supplementary Table 1.



**Figure S1. Correlation between beta-cell function values estimated by Inc(AUC-CG) and C-peptide index.**

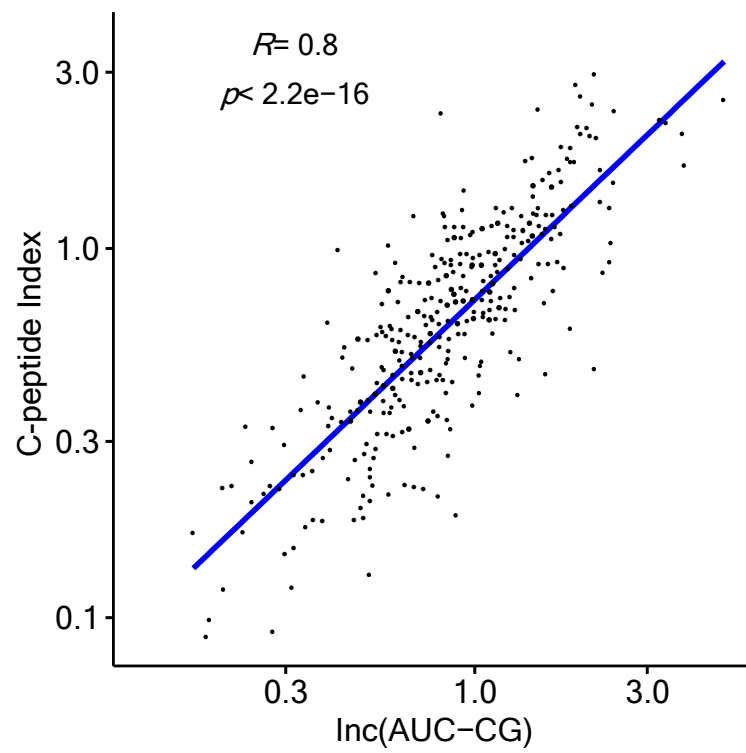

Figure S2. Box-plot of number of reactive blots in T cell-positive (T+) and T cell- negative (T-) groups.

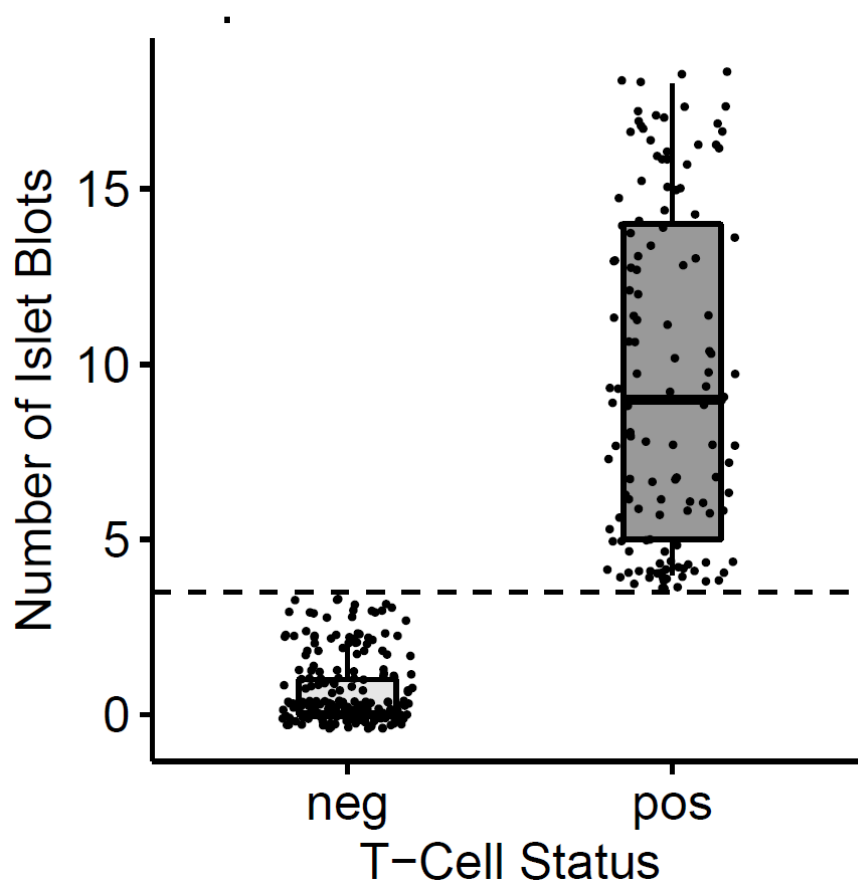

Dashed line indicates cutoff value that distinguishes T cell-negative patients from T cell- positive (T+) patients. T cell-negative (T-)  $\leq 3$  blots; T+  $\geq 4$  blots. See text for details.

**Figure S3. GAD65Ab titers in Black/African American compared with White participants among those who were GAD65Ab-positive.**

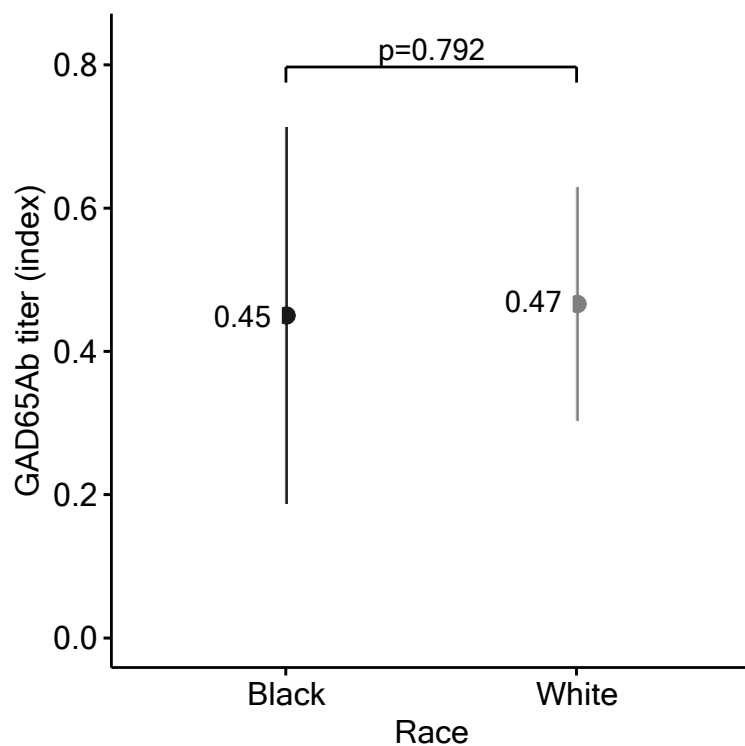

Note: Black / African American: N=8 GAD65Ab-positive; N=58 GAD65Ab-negative.  
White: N=12 GAD65Ab-positive; N=252 GAD65Ab-negative.

Data are mean +/- SE.

**Figure S4. Histograms of Inc(AUC-CG) and C-peptide index values.**

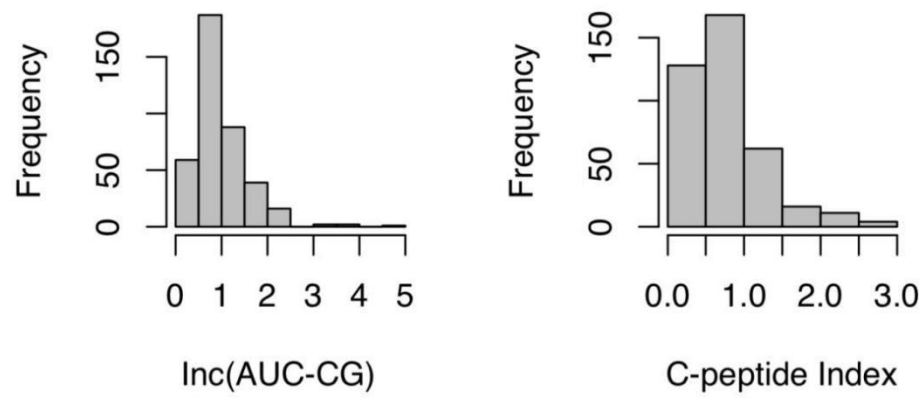

**Figure S5. Residual-vs-fitted plots and QQ-plots for assessing the heteroscedasticity of regression outcomes over the range of T cell reactivity values.**

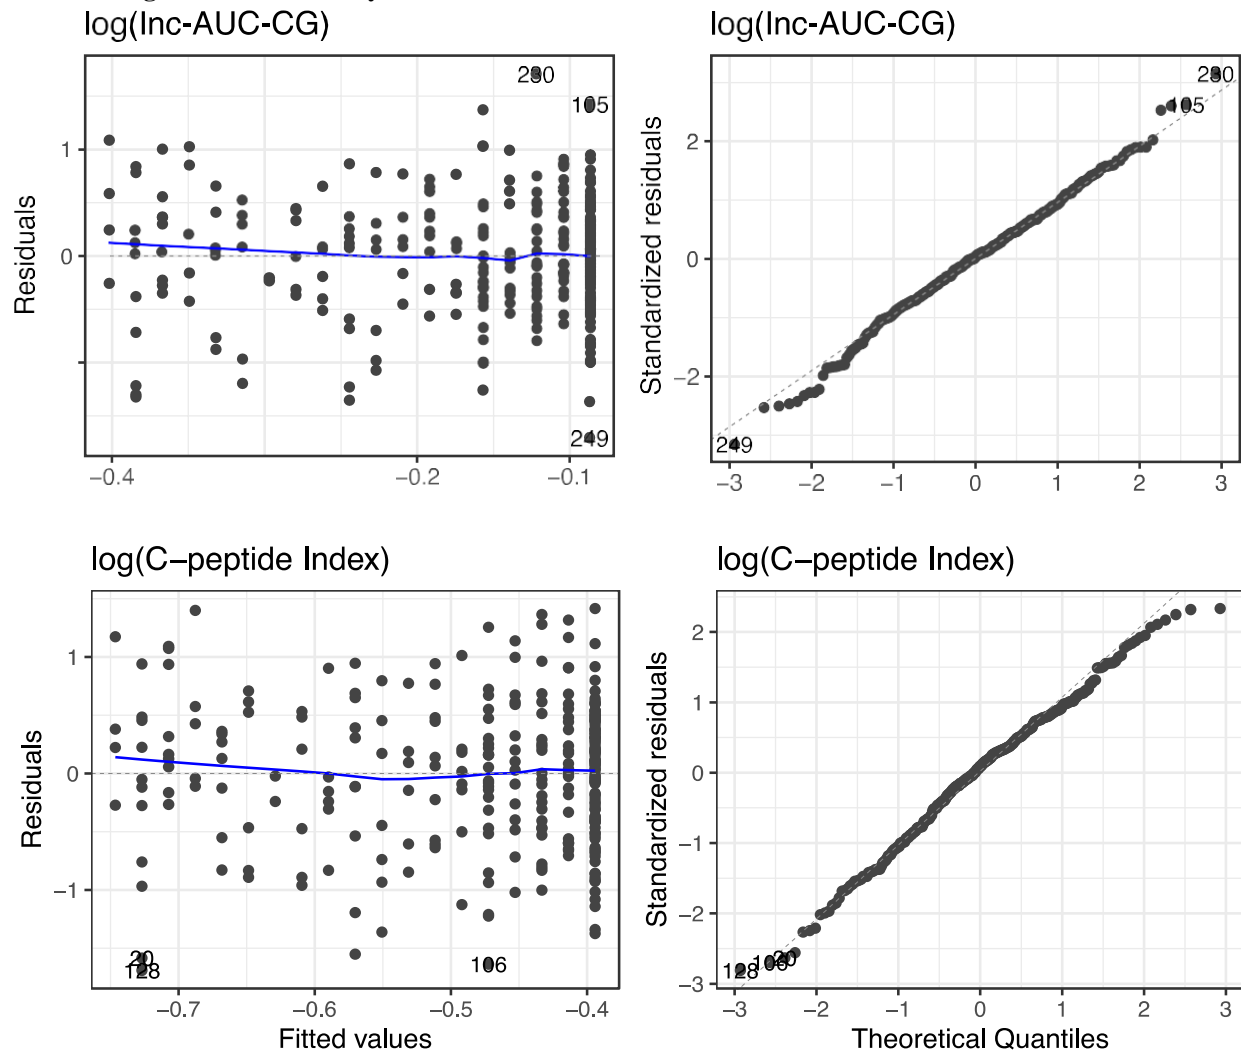

## Complete GRADE Research Group

| Current Clinical Centers                                                  | <b>Investigators/Designations:</b><br>Principal Investigator (PI); Co-Principal Investigator (Co-PI); Co- Investigator (Co-I); Study Coordinator (SC); Recruitment/Retention Coordinator (RC); Research Staff (RS)                                                                                                                                                                                                                                                        |
|---------------------------------------------------------------------------|---------------------------------------------------------------------------------------------------------------------------------------------------------------------------------------------------------------------------------------------------------------------------------------------------------------------------------------------------------------------------------------------------------------------------------------------------------------------------|
| Albert Einstein College of Medicine                                       | Crandall, Jill P. (PI); McKee, Melissa Diane (PI, past); Brown-Friday, Janet (SC); Xhori, Entila (RC, past); Ballentine-Cargill, Keisha (RS); Duran, Sally (RS); Lukin, Jennifer (RS); Beringher, Stephanie (RS, past); Gonzalez de la torre, Susana (RS, past)                                                                                                                                                                                                           |
| Atlanta VA Medical Center                                                 | Phillips, Lawrence (PI); Burgess, Elizabeth (Co-I); Olson, Darin (Co- I); Rhee, Mary (Co-I); Wilson, Peter (Co-I); Raines, Tasha Stephanie (SC); Costello, Julie (SC); Gullett, Chona (SC); Maher-Albertelli, Maxine (SC); Morehead, Folayan (SC); Mungara, Radhika (SC); Person, Saranjit (SC); Savoye, Louise (SC); Sibymon, Mabil (SC); Tanukonda, Sridhar (SC); White, Carol Ann (SC); Holloway, Leah (SC, past); Adams, Cynthia (RC, past); Ross, April (RC, past)   |
| Baylor College of Medicine                                                | Balasubramanyam, Ashok (PI); Gonzalez Hattery, Erica (SC); Gaba, Ruchi (Co-I); Montes, Graciela (RC); Wright, Charlyne (RS, past)                                                                                                                                                                                                                                                                                                                                         |
| Baylor Research Institute                                                 | Hollander, Priscilla (PI); Roe, Erin (Co-I); Uy, Analyn (SC); Burt, Polly (SC, past); Estrada, Lorie (RS); Chionh, Kris (RS, past)                                                                                                                                                                                                                                                                                                                                        |
| Case Western Reserve University/ Cleveland VA/ MetroHealth Medical Center | Ismail-Beigi, Famararz (PI); Falck-Ytter, Corinna (Co-PI); Sayyed Kassem, Laure (Co-PI); Sood, Ajay (Co-PI, past); Tiktin, Margaret (Co-I, SC); Cramer, Bethany (SC); Iacoboni, Jacalyn (SC); Kononets, Maria V. (SC); Kulow, Tanya (SC); Newman, Cynthia (SC); Stancil, Katherine A. (SC); Sanders, Cristina (SC, past); Tucker, Lisa (SC, past); Werner, Amanda (SC, past); Krol, Adrienne (RS); McPhee, Gloria (RS); Patel, Christine (RS); Colosimo, Linda (RS, past) |
| Columbia University Medical Center                                        | Goland, Robin (PI); Pring, James (SC); Kringas, Patricia (SC, past); Tejada, Jessica (RC); Hausheer, Camille (RC, past); Schneier, Harvey (RS); Gumpel, Kelly (RS, past); Kirpitch, Amanda (RS, past)                                                                                                                                                                                                                                                                     |
| Duke University Medical Center                                            | Green, Jennifer B. (PI); AbouAssi, Hiba (Co-I); Chatterjee, Ranee (Co- I); Feinglos, Mark N. (Co-I); English Jones, Jennifer (SC, RC); Khan, Shubi A. (SC, RC); Kimpel, Jeanne B. (SC); Zimmer, Ronna P. (SC, past); Furst, Mary (RC, past); Satterwhite, Barbara M. (RS); Thacker, Connie R (RS); Evans Kreider, Kathryn (RS, past)                                                                                                                                      |

|                                                      |                                                                                                                                                                                                                                                                                                                                                                                                                                                                                                                                                                                         |
|------------------------------------------------------|-----------------------------------------------------------------------------------------------------------------------------------------------------------------------------------------------------------------------------------------------------------------------------------------------------------------------------------------------------------------------------------------------------------------------------------------------------------------------------------------------------------------------------------------------------------------------------------------|
| Indiana University                                   | Mather, Kieren J. (PI); Lteif, Amale (Co-I, past); Hamilton, Tonya (SC); Patel, Nick (SC, past); Riera, Gabriela (RC); Jackson, Marcia (RC, past); Pirics, Vivian (RC, past); Howard, Devin (RS); Aguillar, Danielle (RS, past); Hurt, Sloan (RS, past)                                                                                                                                                                                                                                                                                                                                 |
| International Diabetes Center                        | Bergental, Richard (PI); Carlson, Anders (Co-I); Martens, Thomas (Co-I); Johnson, Mary (SC); Hill, Renae (SC); Hyatt, Jamie (SC); Jensen, Connie (SC); Madden, Marcia (SC); Martin, Dianna (SC); Willis, Holly (SC); Konerza, Wanda (RS); Passi, Rebecca (RS); Kleeberger, Kathleen (RS, past)                                                                                                                                                                                                                                                                                          |
| Kaiser Permanente Northwest                          | Fortmann, Stephen (PI); Herson, Michael (Co-I); Mularski, Karen (Co-I); Glauber, Harry (Co-I, past); Prihoda, James (Co-I, past); Ash, Britt (SC); Carlson, Christina (SC); Ramey, Phyllis Anne (SC); Schield, Emily (SC); Torgimson-Ojerio, Britta (SC); Arnold, Kathy (SC, past); Kauffman, Bryan (SC, past); Panos, Eleese (SC, past); Sahnaw, Samantha (RC); Bays, Kristi (RS); Cook, Jennifer (RS); Gluth, Jennifer (RS); Sasaki, Debra (RS); Schell, Katrina (RS); Criscola, Jennifer (RS, past); Friason, Camille (RS, past); Jones, Suzi (RS, past); Nazarov, Sergey (RS, past) |
| Kaiser Permanente of Georgia                         | Barzilay, Joshua (PI); Rassouli, Negah (Co-PI); Puttnam, Rachel (Co- I); Curtis, Michelle (SC); Stokes, Kia (SC); Hollis, Bonita (SC, past); Sanders-Jones, Cynthia (SC, past); Nelson, Roslin (RC); El-Haqq, Zakiah (RS, past); Kolli, Abby (RS, past); Tran, Tu (RS, past)                                                                                                                                                                                                                                                                                                            |
| Massachusetts General Hospital                       | Wexler, Deborah (PI); Larkin, Mary (Co-I); Meigs, James (Co-I); Dushkin, Amy (SC); Rocchio, Gianna (SC); Chambers, Brittany (SC, past); Yepes, Mike (SC, past); Steiner, Barbara (RC); Dulin, Hilary (RC, past); Cayford, Melody (RS); DeManbey, Andrea (RS); Gurry, Lindsey (RS); Hillard, Mallory (RS); Martin, Kimberly (RS); Stevens, Christine (RS); Thangthaeng, Nopporn (RS); Kochis, Raquel (RS, past); Raymond, Elyse (RS, past); Ripley, Valerie (RS, past)                                                                                                                   |
| MedStar Health Research Institute/ MedStar Baltimore | Park, Jean (PI); Aroda, Vanita (PI, past); Ghazi, Adline (Co-PI); Loveland, Amy (SC); Hurtado, Maria (SC); Kuhn, Alexander (SC); Mofor, Florence (SC)                                                                                                                                                                                                                                                                                                                                                                                                                                   |
| Miami VA Healthcare System/ University of Miami      | Florez, Hermes J. (PI); Valencia, Willy Marcos (PI); Marks, Jennifer (Co-PI, past); Oropesa-Gonzalez, Lisset (SC); Riccio Veliz, Ana K. (SC); Nieto-Martinez, Ramfis (SC); Gutt, Miriam (RC)                                                                                                                                                                                                                                                                                                                                                                                            |

|                                                                  |                                                                                                                                                                                                                                                                                                                                                                                                                                                                                          |
|------------------------------------------------------------------|------------------------------------------------------------------------------------------------------------------------------------------------------------------------------------------------------------------------------------------------------------------------------------------------------------------------------------------------------------------------------------------------------------------------------------------------------------------------------------------|
| Oregon Health & Science University                               | Ahmann, Andrew (PI); Aby-Daniel, Diana (Co-I); Joarder, Farahnaz (Co-I); Morimoto, Victoria (Co-I); Sprague, Carol (Co-I); Yamashita, Daisuke (Co-I); Cady, Nancy (SC); Kirchhoff, Patricia (SC); Rivera- Eschright, Nadia (SC); Adducci, Joseph (RC); Morales Gomez, Brianna (RC); Goncharova, Alina (RC, past)                                                                                                                                                                         |
| Pacific Health Research & Education Institute/VA Pacific Islands | Hox, Sophia H. (PI); Petrovitch, Helen (Co-PI); Matwichyna, Michael (SC); Jenkins, Victoria (SC, past); Bermudez, Nina O. (RS); Ishii, Renée R. (RS)                                                                                                                                                                                                                                                                                                                                     |
| Pennington Biomedical Research Center                            | Hsia, Daniel S. (PI); Cefalu, William T. (PI, past); Greenway, Frank L. (Co-I); Waguespack, Celeste (Co-I); King, Erin (SC); Haynes, Natalie (SC, past); Thomassie, Amy (SC, past); Bourgeois, Brandi (RC, past); Hazlett, Claire (RS)                                                                                                                                                                                                                                                   |
| San Diego VA Medical Center                                      | Henry, Robert (PI); Mudaliar, Sunder (Co-I); Boeder, Schafer (Co-I, past); Pettus, Jeremy (Co-I, past); Diaz, Elsa (SC); DeLue, Catherine (SC, past); Castro, Erick (RC, past); Hernandez, Sylvia (RC, past)                                                                                                                                                                                                                                                                             |
| Southwestern American Indian Center                              | Krakoff, Jonathan (PI); Curtis, Jeffrey M. (Co-I); Killeen, Tina (SC); Joshevama, Erica (RC); Diaz, Enrique (RS); Martin, Denelle (RS); Karshner, Tracey (RS, past)                                                                                                                                                                                                                                                                                                                      |
| St. Luke's-Roosevelt Hospital                                    | Albu, Jeanine (Co-PI); Pi-Sunyer, F. Xavier (Co-PI); Frances, Sylvaine (SC); Maggio, Carol (SC, past); Ellis, Emily (RC); Bastawrose, Joseph (RC, past); Gong, Xiuqun (RS)                                                                                                                                                                                                                                                                                                               |
| SUNY Downstate Medical Center/ New York Hospital-Queens          | Banerji, Mary Ann (PI); August, Phyllis (Co-I); Lorber, Daniel (Co-I); Brown, Necole M. (SC, RC); Josephson, Debra H. (SC); Thomas, Lorraine L. (SC, RC); Tsovian, Mari (SC, RC); Cherian, Ajini (SC, RC, past); Jacobson, Marlo H. (RS); Mishko, Motria M. (RS)                                                                                                                                                                                                                         |
| The University of North Carolina Diabetes Care Center            | Kirkman, M. Sue (PI); Bergamo, Katherine (Co-I); Buse, John B. (Co-I); Dostou, Jean (Co-I); Young, Laura (Co-I); Goley, April (Co-I, past); Kerr, Jeffrey (Co-I, past); Largay, Joseph F. (Co-I, past); Guarda, Sonia (SC); Cuffee, Juanita (SC, past); Culmer, Dawn (SC, past); Fraser, Rachael (RC); Almeida, Hope (RC, past); Coffey, Samantha (RC, past); Debnam, Elizabeth (RC, past); Kiker, Lauren (RC, past); Morton, Sarah (RC, past); Josey, Kim (RS); Fuller, Gail (RS, past) |
| University of Alabama Birmingham                                 | Garvey, W. Timothy (PI); Cherrington, Andrea (Co-PI); Golson, Dana (SC); Griffith, Olivia (SC); Robertson, Mary Catherine (SC); Agne, April (RC); McCullars, Steve (RC)                                                                                                                                                                                                                                                                                                                  |
| University of Cincinnati/ Cincinnati VA Medical Center           | Cohen, Robert M. (PI); Craig, Jacqueline (SC); Kersey, Kimberly (SC, RC); Rogge, M. Colleen (SC); Wilson, Carla (SC); Burton, Kathryn (SC, past); Lipp, Sonia (RC, past); Vonder Meulen, Mary Beth (RC, past)                                                                                                                                                                                                                                                                            |



|                                                           |                                                                                                                                                                                                                                                                                                                                                                                  |
|-----------------------------------------------------------|----------------------------------------------------------------------------------------------------------------------------------------------------------------------------------------------------------------------------------------------------------------------------------------------------------------------------------------------------------------------------------|
| University of Colorado-Denver VA                          | Rasouli, Neda (PI); Schroeder, Emily (Co-I); Steiner, Stephanie (SC); Baker, Chelsea (SC, RS); Underkofler, Chantal (SC); Douglass, Sara (SC, past)                                                                                                                                                                                                                              |
| University of Iowa                                        | Sivitz, William (PI); Cline, Erin (SC); Knosp, Laura (SC); McConnell, Jennifer (SC, past); Lowe, Tamara (RC)                                                                                                                                                                                                                                                                     |
| University of Michigan                                    | Herman, William H. (PI); Pop-Busui, Rodica (Co-PI); Tan, Meng H. (Co-I); Martin, Catherine (SC); Waltje, Andrea (SC, RC); Goodhall, Lynn (SC, past); Eggleston, Rebecca (RC, past); Kuo, Shihchen (RS); Bule, Stephanie (RS, past); Kessler, Nancy (RS, past); LaSalle, Elizabeth (RS, past)                                                                                     |
| University of Minnesota                                   | Seaquist, Elizabeth R. (PI); Bantle, Anne (Co-I); Kumar, Anjali (Co-I); Redmon, Bruce (Co-I); Bantle, John (Co-I, past); Harindhanavudhi, Tasma (Co-I, past); Coe, Mary (SC); Mech, Michael (SC); Taddese, Abdisa (RC); Lesne, Lesia (RS); Smith, Shannon (RS)                                                                                                                   |
| University of Nebraska Medical Center/Omaha VA            | Desouza, Cyrus (PI); Kuechenmeister, Lisa (Co-I); Shivaswamy, Vijay (Co-I); Morales, Ana Laura (SC); Rodriguez, Maria Grace (SC); Seipel, Kris (SC); Alfred, Alissa (SC, past); Eggert, Jenna (RS); Lord, Grace (RS); Taylor, William (RS); Tillson, Renee (RS)                                                                                                                  |
| University of New Mexico                                  | Schade, David S. (PI); Adolphe, Allen (Co-PI); Burge, Mark (Co-PI); Duran-Valdez, Elizabeth (SC); Martinez, Janae (RC); Hernandez McGinnis, Doris (RS); Pucchetti, Benjamin (RS, past); Scripsick, Elizabeth (RS, past)                                                                                                                                                          |
| University of Texas Health Science Center                 | DeFronzo, Ralph A. (PI); Cersosimo, Eugenio (Co-PI); Abdul-Ghani, Muhammad (Co-I); Triplitt, Curtis (Co-I); Verastiqui, Hector (SC); Garza, Rosa Irene (SC); Wright, Kathryn (RC, past); Puckett, Curtiss (RS)                                                                                                                                                                   |
| University of Texas-Southwestern Medical Center           | Raskin, Philip (PI); Rhee, Chanhaeng (Co-I, past); Abraham, Soma (SC); Jordan, Lin Fan (SC); Sao, Serey (SC); Morton, Luisa (SC, past); Smith, Oralenda (SC, past); Osornio Walker, Laura (RC, past); Schnurr-Breen, Laura (RC, past); Ayala, Rosa (RS); Kraymer, Robert Brian (RS); Sturgess, Daytheon (RS, past)                                                               |
| VA Puget Sound Healthcare System/University of Washington | Utzschneider, Kristina M. (PI); Kahn, Steven E. (Co-PI); Alarcon-Casas Wright, Lorena (Co-I); Boyko, Edward J. (Co-I); Tsai, Elaine C. (Co-I); Trence, Dace L. (Co-I, past); Fattaleh, Basma N. (SC); Montgomery, Brenda K. (SC, past); Atkinson, Karen M. (RS); Concepcion, Tessa (RS, past); Kozedub, Alexandra (RS); Moak, Cameron (RS, past); Rhothisen, Samantha (RS, past) |
| Vanderbilt University                                     | Elasz, Tom A. (PI); Martin, Stephanie (SC); Shackelford, Laura (RC, RS); Goidel, Rita (RS); Hinkle, Nina (RS); Lipps Hogan, Janie (RS); Lovell, Cynthia (RS); Myers, Janet (RS)                                                                                                                                                                                                  |

|                                                                                      |                                                                                                                                                                                                                                                                                                                                                                                                                                             |
|--------------------------------------------------------------------------------------|---------------------------------------------------------------------------------------------------------------------------------------------------------------------------------------------------------------------------------------------------------------------------------------------------------------------------------------------------------------------------------------------------------------------------------------------|
| Washington University                                                                | McGill, Janet B. (PI); Salam, Maamoun (Co-I); Kissel, Sarah (SC, RC); Schweiger, Toni (SC, RC); Recklein, Carol (SC, past)                                                                                                                                                                                                                                                                                                                  |
| Yale University/Fair Haven Community Health Center                                   | Tamborlane, William (PI); Gatcomb, Patricia (SC); Camp, Anne (Co-I); Gulanski, Barbara (Co-I); Inzucchi, Silvio (Co-I); Pham, Kim (Co-I); Alguard, Michele (SC, RC); Lessard, Katarzyna (SC); Perez, Magalys (SC); Magenheimer, Elizabeth (RC); Montoza, Abmaridel (RC)                                                                                                                                                                     |
| <b>Chairman's Office</b>                                                             |                                                                                                                                                                                                                                                                                                                                                                                                                                             |
| <b>Massachusetts General Hospital, Harvard Medical School</b>                        | Nathan, David M. (Study Chair)                                                                                                                                                                                                                                                                                                                                                                                                              |
| <b>Executive Committee</b>                                                           |                                                                                                                                                                                                                                                                                                                                                                                                                                             |
|                                                                                      | Nathan, David M. (Study Chair); Lachin, John (PI); Buse, John B. (Co-I); Kahn, Steven E. (Co-I); Krause-Steinrauf, Heidi (Co-I, Project Director); Larkin, Mary (Co-I); Tiktin, Margaret (Co-I, SC); Wexler, Deborah (PI); Burch, Henry B. (Program Scientist); Linder, Barbara (Program Official); Bremer, Andrew (Program Scientist, past)                                                                                                |
| <b>Coordinating Center</b>                                                           |                                                                                                                                                                                                                                                                                                                                                                                                                                             |
| <b>The George Washington University Biostatistics Center</b>                         | Lachin, John (PI); Krause-Steinrauf, Heidi (Co-I); Younes, Naji (Co-I); Backman, Michael (RS); Bebu, Ionut (RS); Buys, CJ (RS); Fagan Murphy, Anna (RS); Gao, Yuping (RS); Gramzinski, Michaela (RS); Hall, Stephanie (RS); Legowski, Elizabeth (RS); Arey, Alyssa (RS, past); Bethupu, Joel (RS, past); Lund, Claire (RS, past); Mangat Dhaliwal, Pam (RS, past); McGee, Paula (RS, past); Mesimer, Emily (RS, past); Ngo, Lisa (RS, past) |
| <b>Central Biochemical Laboratory</b>                                                |                                                                                                                                                                                                                                                                                                                                                                                                                                             |
| <b>University of Minnesota Advanced Research &amp; Diagnostic Laboratory</b>         | Steffes, Michael (PI); Seegmiller, Jesse (Co-I); Saenger, Amy (Co-I, past); Arends, Valerie (SC); Gabrielson, Deanna (SC, past)                                                                                                                                                                                                                                                                                                             |
| <b>Drug Distribution Center</b>                                                      |                                                                                                                                                                                                                                                                                                                                                                                                                                             |
| <b>VA Cooperative Studies Program Clinical Research Pharmacy Coordinating Center</b> | Conner, Todd (PI); Warren Stuart (PI, past); Day, Jolene (RS); Scrymgeour, Alexandra (RS)                                                                                                                                                                                                                                                                                                                                                   |
| <b>ECG Reading Center</b>                                                            |                                                                                                                                                                                                                                                                                                                                                                                                                                             |
| <b>EPICARE, Wake Forest University</b>                                               | Soliman, Elsayed Z. (PI); Zhang, Zhu-Ming (Co-I, past); Campbell, Charles (SC); Hu, Julie (SC);                                                                                                                                                                                                                                                                                                                                             |

|                                                                                        |                                                                                                                                                                                                                                                                                                                                                                                                                                                                                                                                                                                                                                                                                                                                                                                                                                                          |
|----------------------------------------------------------------------------------------|----------------------------------------------------------------------------------------------------------------------------------------------------------------------------------------------------------------------------------------------------------------------------------------------------------------------------------------------------------------------------------------------------------------------------------------------------------------------------------------------------------------------------------------------------------------------------------------------------------------------------------------------------------------------------------------------------------------------------------------------------------------------------------------------------------------------------------------------------------|
|                                                                                        | Keasler, Lisa (SC); Hensley, Susan (SC, past); Li, Yabing (RS)                                                                                                                                                                                                                                                                                                                                                                                                                                                                                                                                                                                                                                                                                                                                                                                           |
| <b>Economic Evaluation and Assessment Center</b>                                       |                                                                                                                                                                                                                                                                                                                                                                                                                                                                                                                                                                                                                                                                                                                                                                                                                                                          |
| <b>University of Michigan</b><br><br><b>Centers for Disease Control and Prevention</b> | Herman, William (PI); Martin, Catherine (SC); Waltje, Andrea (SC, RC); Kuo, Shihchen (RS); Mihalcea, Rada (RS); Perez-Rosas, Veronica (RS); Prosser, Lisa (RS); Resnicow, Kenneth (RS); Ye, Wen (RS)<br>Shao, Hui (RS); Zhang, Ping (RS)                                                                                                                                                                                                                                                                                                                                                                                                                                                                                                                                                                                                                 |
| <b>Neurocognitive Coordinating Center</b>                                              |                                                                                                                                                                                                                                                                                                                                                                                                                                                                                                                                                                                                                                                                                                                                                                                                                                                          |
| <b>Columbia University Medical Center</b>                                              | Luchsinger, Jose (PI); Sanchez, Danurys (SC)                                                                                                                                                                                                                                                                                                                                                                                                                                                                                                                                                                                                                                                                                                                                                                                                             |
| <b>NIH/NIDDK</b>                                                                       |                                                                                                                                                                                                                                                                                                                                                                                                                                                                                                                                                                                                                                                                                                                                                                                                                                                          |
|                                                                                        | Burch, Henry B. (Project Scientist); Bremer, Andrew (Program Scientist, past); Linder, Barbara (Program Official); Fradkin, Judith (Director, past)                                                                                                                                                                                                                                                                                                                                                                                                                                                                                                                                                                                                                                                                                                      |
| <b>QWB Reading Center</b>                                                              |                                                                                                                                                                                                                                                                                                                                                                                                                                                                                                                                                                                                                                                                                                                                                                                                                                                          |
| <b>University of California San Diego Health Services Research Center</b>              | Groessl, Erik (PI); Chong, Helen (SC); Hillery, Naomi (RS)                                                                                                                                                                                                                                                                                                                                                                                                                                                                                                                                                                                                                                                                                                                                                                                               |
| <b>Collaborating Investigators</b>                                                     |                                                                                                                                                                                                                                                                                                                                                                                                                                                                                                                                                                                                                                                                                                                                                                                                                                                          |
| Site Recruitment                                                                       | Abdouch, Ivan (University of Nebraska Medical Center/Omaha VA); Brantley, Paula (Pennington Biomedical Research Center (LSU)); Broyles, Frances E. (SIBCR – VA Puget Sound); Canaris, Gay (University of Nebraska Medical Center/Omaha VA); Copeland, Paul (Massachusetts General Hospital); Craine, Jeri J. (SIBCR – VA Puget Sound); Fein, Warren L. (SIBCR – VA Puget Sound); Lee, Melissa S. (SUNY Downstate Medical Center); Meiners, Rebecca (Pennington Biomedical Research Center (LSU)); Meiners, Vaughn (Pennington Biomedical Research Center (LSU)); O’Neal, Hollis (Pennington Biomedical Research Center (LSU)); Park, James E. (SIBCR – VA Puget Sound); Sledge, Jr., Edward (Pennington Biomedical Research Center (LSU)); Steppel-Resnick, Jeanne (Massachusetts General Hospital); Turchin, Alexander (Massachusetts General Hospital) |
| Beta Cell Ancillary Study                                                              | Brooks-Worrell, Barbara (University of Washington); Hampe, Christiane S. (University of Washington); Palmer, Jerry P. (University of                                                                                                                                                                                                                                                                                                                                                                                                                                                                                                                                                                                                                                                                                                                     |

|                               |                                                                                                                                                                                                                                         |
|-------------------------------|-----------------------------------------------------------------------------------------------------------------------------------------------------------------------------------------------------------------------------------------|
|                               | Washington); Shojaie, Ali (University of Washington)                                                                                                                                                                                    |
| Continuous Glucose Monitoring | Higgins, John (Massachusetts General Hospital)                                                                                                                                                                                          |
| Emotional Distress Substudy   | Fischer, Lawrence (Consultant); Golden, Sherita (Johns Hopkins University); Gonzalez, Jeffery (Albert Einstein College of Medicine); Naik, Aanand (Baylor College of Medicine); Walker, Elizabeth (Albert Einstein College of Medicine) |
| NDEP                          | Doner Lotenberg, Lynne (Hager Sharp); Gallivan, Joanne M. (National Institutes of Health); Lim, Joanne (Hager Sharp); Tuncer, Diane M. (National Institutes of Health)                                                                  |
| Recruitment Ancillary Study   | Behringer-Massera, Stephanie (The Mount Sinai Hospital, Beth Israel Medical Center)                                                                                                                                                     |

**Supplementary Table 1. Summary of inferences for hypotheses involving T cell status, T cell reactivity (continuous variable) and antibody status and measures of  $\beta$ -cell function (C-peptide index and Inc(AUC-CG)).**

| outcome   | adjust  | variable | beta   | reldiff | absdiff | pvalue | qvalue | beta_CI       | rdif_CI      | adif_CI       | beta_adjCI    | rdif_adjCI   | adif_adjCI    |
|-----------|---------|----------|--------|---------|---------|--------|--------|---------------|--------------|---------------|---------------|--------------|---------------|
| iAUCCG    | 1/cpep0 | tcellpos | -0.121 | 0.114   | -0.091  | 0.042  | 0.044  | -0.238,-0.004 | 0.004,0.212  | -0.174,-0.008 | -0.238,-0.004 | 0.004,0.212  | -0.174,-0.008 |
| cpepIndex | 1/cpep0 | tcellpos | -0.195 | 0.177   | -0.114  | 0.006  | 0.017  | -0.333,-0.057 | 0.055,0.283  | -0.188,-0.041 | -0.364,-0.026 | 0.026,0.305  | -0.188,-0.041 |
| iAUCCG    | HOMA2   | tcellpos | -0.141 | 0.132   | -0.104  | 0.022  | 0.044  | -0.262,-0.02  | 0.02,0.23    | -0.187,-0.021 | -0.279,-0.003 | 0.003,0.244  | -0.187,-0.021 |
| cpepIndex | HOMA2   | tcellpos | -0.210 | 0.190   | -0.122  | 0.003  | 0.013  | -0.351,-0.07  | 0.067,0.296  | -0.195,-0.049 | -0.389,-0.031 | 0.031,0.323  | -0.195,-0.049 |
| iAUCCG    | 1/cpep0 | tcellcnt | -0.013 | 0.013   | -0.010  | 0.022  | 0.025  | -0.025,-0.002 | 0.002,0.024  | -0.019,-0.002 | -0.025,-0.002 | 0.002,0.024  | -0.019,-0.002 |
| cpepIndex | 1/cpep0 | tcellcnt | -0.019 | 0.019   | -0.012  | 0.005  | 0.015  | -0.032,-0.006 | 0.006,0.032  | -0.02,-0.004  | -0.035,-0.003 | 0.003,0.035  | -0.02,-0.004  |
| iAUCCG    | HOMA2   | tcellcnt | -0.015 | 0.015   | -0.012  | 0.013  | 0.025  | -0.027,-0.003 | 0.003,0.027  | -0.021,-0.003 | -0.029,-0.002 | 0.002,0.028  | -0.021,-0.003 |
| cpepIndex | HOMA2   | tcellcnt | -0.020 | 0.020   | -0.013  | 0.003  | 0.012  | -0.034,-0.007 | 0.007,0.033  | -0.021,-0.004 | -0.038,-0.003 | 0.003,0.037  | -0.021,-0.004 |
| iAUCCG    | 1/cpep0 | antibody | 0.004  | 0.004   | 0.003   | 0.968  | 1.000  | -0.185,0.193  | -0.169,0.212 | -0.148,0.154  | -0.185,0.193  | -0.169,0.212 | -0.148,0.154  |
| cpepIndex | 1/cpep0 | antibody | -0.136 | 0.128   | -0.082  | 0.200  | 0.800  | -0.345,0.072  | -0.075,0.292 | -0.2,0.035    | -0.403,0.13   | -0.138,0.331 | -0.2,0.035    |
| iAUCCG    | HOMA2   | antibody | 0.010  | 0.010   | 0.008   | 0.917  | 1.000  | -0.182,0.202  | -0.166,0.224 | -0.145,0.161  | -0.209,0.23   | -0.189,0.258 | -0.145,0.161  |
| cpepIndex | HOMA2   | antibody | -0.132 | 0.124   | -0.080  | 0.221  | 0.800  | -0.344,0.08   | -0.083,0.291 | -0.199,0.04   | -0.391,0.127  | -0.135,0.324 | -0.199,0.04   |

“outcome”: the outcome of the regression model (applied after log transformation); “adjust”: variable used to adjust for insulin sensitivity (1 over fasting C-peptide or c-peptide-based HOMA2-S); “variable”: covariate of interest (one of T cell status (tcellpos), T cell reactivity (tcellcnt), or antibody status (antibody)); “beta”: coefficient of regression model; “reldiff”: relative difference (fractional change in outcome for change in variable); “absdiff”: absolute change in outcome for change in covariate for an average male patient (see main text for); “pvalue”: p-value for testing beta=0; “qvalue”: adjusted p-value for multiple comparison using Holm’s procedure; “beta\_CI”, “rdif\_CI” and “adif\_CI”: confidence intervals for the original parameter (beta), the relative difference and the absolute difference; “beta\_adjCI”, “rdif\_adjCI” and “adif\_adjCI”: corresponding adjusted confidence intervals using Holm’s procedure.

## References

1. Emoto M, Nishizawa Y, Maekawa K, et al. Homeostasis Model Assessment as a clinical index of insulin resistance in type 2 diabetic patients treated with sulfonylureas. *Diabetes Care* 1999;**22**:818–22.
2. Katsuki A, Sumida Y, Gabazza EC, et al. Homeostasis Model Assessment is a reliable indicator of insulin resistance during follow-up of patients with type 2 diabetes. *Diabetes Care* 2001;**24**:362–5.
3. Donohue MC, Gamst AC, Edland SD, et al. "Package 'longpower'." *Biometrics* 2013;**53**(3): 937–47.
4. Ludbrook J. Multiple comparison procedures updated. *Clin Exp Pharmacol Physiol* 1998;**25**(12):1032–7.
5. Cohen J. *Statistical Power Analysis for the Behavioral Sciences*. 2nd ed. New York: Routledge; 2013.
6. Zhang Z, Mai Y. WebPower: basic and advanced statistical power analysis. R package version 0.5.2 (2018).
7. Kronmal RA. Spurious correlation and the fallacy of the ratio standard revisited. *Journal of the Royal Statistical Society: Series A* 1993;**156**(3):379–92.
8. Manning WG. The logged dependent variable, heteroscedasticity, and the retransformation problem. *Journal of Health Economics* 1998;**17**(3):283–95.
9. Tang Y, Horikoshi M, Li W. "ggfortify": Unified interface to visualize statistical results of popular R packages. *R J* 2016;**8**:2:474.
10. Buja A, et al. Models as approximations I: consequences illustrated with linear regression. *Statistical Science* 2019;**34**:4:523–44.
11. Whitney D, Shojaie A, Carone M. Comment: Models as (Deliberate) Approximations. *Models as Approximations II: A Model-Free Theory of Parametric Regression* Andreas Buja 2019;34.4:591–8.
12. Otten J, Åhrén B, Olsson T. Surrogate measures of insulin sensitivity vs the hyperinsulinaemic–euglycaemic clamp: a meta-analysis. *Diabetologia* 2014;**57**:1781–8.
13. Wallace TM, Levy JC, Matthews DR. An increase in insulin sensitivity and basal beta-cell function in diabetic subjects treated with pioglitazone in a placebo-controlled randomized study. *Diabet Med* 2004;**21**:568–76.
14. Fuller, Wayne A. (1987). *Measurement Error Models*. John Wiley & Sons. p. 2. ISBN 978-0-471-86187-4.
15. Clopper CJ, Pearson ES. The Use of Confidence or Fiducial Limits Illustrated in the Case of the Binomial. *Biometrika* 1934;**26**(4):404–13.
16. van Buuren S, Groothuis-Oudshoorn K. mice: Multivariate Imputation by Chained Equations in R. *J Stat*

*Softw* 2011;**1**(3):1–67.

17. Aickin M, Gensler H. Adjusting for multiple testing when reporting research results: The Bonferroni vs Holm methods. *American Journal of Public Health* 1996;**86**(5):726–8.
18. Levin B. On the Holm, Simes, and Hochberg multiple test procedures. *American Journal of Public Health* 1996;**86**(5):628–9.
27. Little R, Rubin D. *Statistical analysis with missing data*. 3rd ed. Hoboken, NJ: John Wiley & Sons, Inc.; 2019.
20. Keener, Robert W. *Theoretical statistics: Topics for a core course*. Springer, 2011.
